# Supplementary material for: Ecological restoration success is higher for natural regeneration than for active restoration in tropical forests
Source: PubMed Central journal article supplement — Sci Adv. 2017 Nov 8;3(11):e1701345. doi: 10.1126/sciadv.1701345 (PMC5677348; doi:10.1126/sciadv.1701345), 2017-11-08
Supplement: 1701345_SM.pdf [file 1701345_SM.pdf]

## Supplementary Materials for

### **Ecological restoration success is higher for natural regeneration than for active restoration in tropical forests**

Renato Crouzeilles, Mariana S. Ferreira, Robin L. Chazdon, David B. Lindenmayer, Jerônimo B. B. Sansevero, Lara Monteiro, Alvaro Iribarrem, Agnieszka E. Latawiec, Bernardo B. N. Strassburg

Published 8 November 2017, *Sci. Adv.* **3**, e1701345 (2017)

DOI: 10.1126/sciadv.1701345

#### **This PDF file includes:**

- fig. S1. Meta-analysis without controlling for the biotic and abiotic factors.
- fig. S2. Regression and box plot analyses for biodiversity.
- fig. S3. Regression and box plot analyses for vegetation structure.
- table S1. Median values of response ratios for active restoration and natural regeneration systems compared with reference systems controlled for the four biotic and abiotic factors (forest cover at the landscape scale, total annual precipitation, past disturbance, and the time elapsed since restoration started) and percentage of enhancement of biodiversity and vegetation structure in natural regeneration with respect to active restoration systems.
- table S2. Median values of response ratios for active restoration and natural regeneration systems compared with reference systems without controlling for the four biotic and abiotic factors (forest cover at the landscape scale, total annual precipitation, past disturbance, and the time elapsed since restoration started) and percentage of enhancement of biodiversity and vegetation structure in natural regeneration with respect to active restoration systems.
- table S3. Selected papers with data available for the meta-analysis.

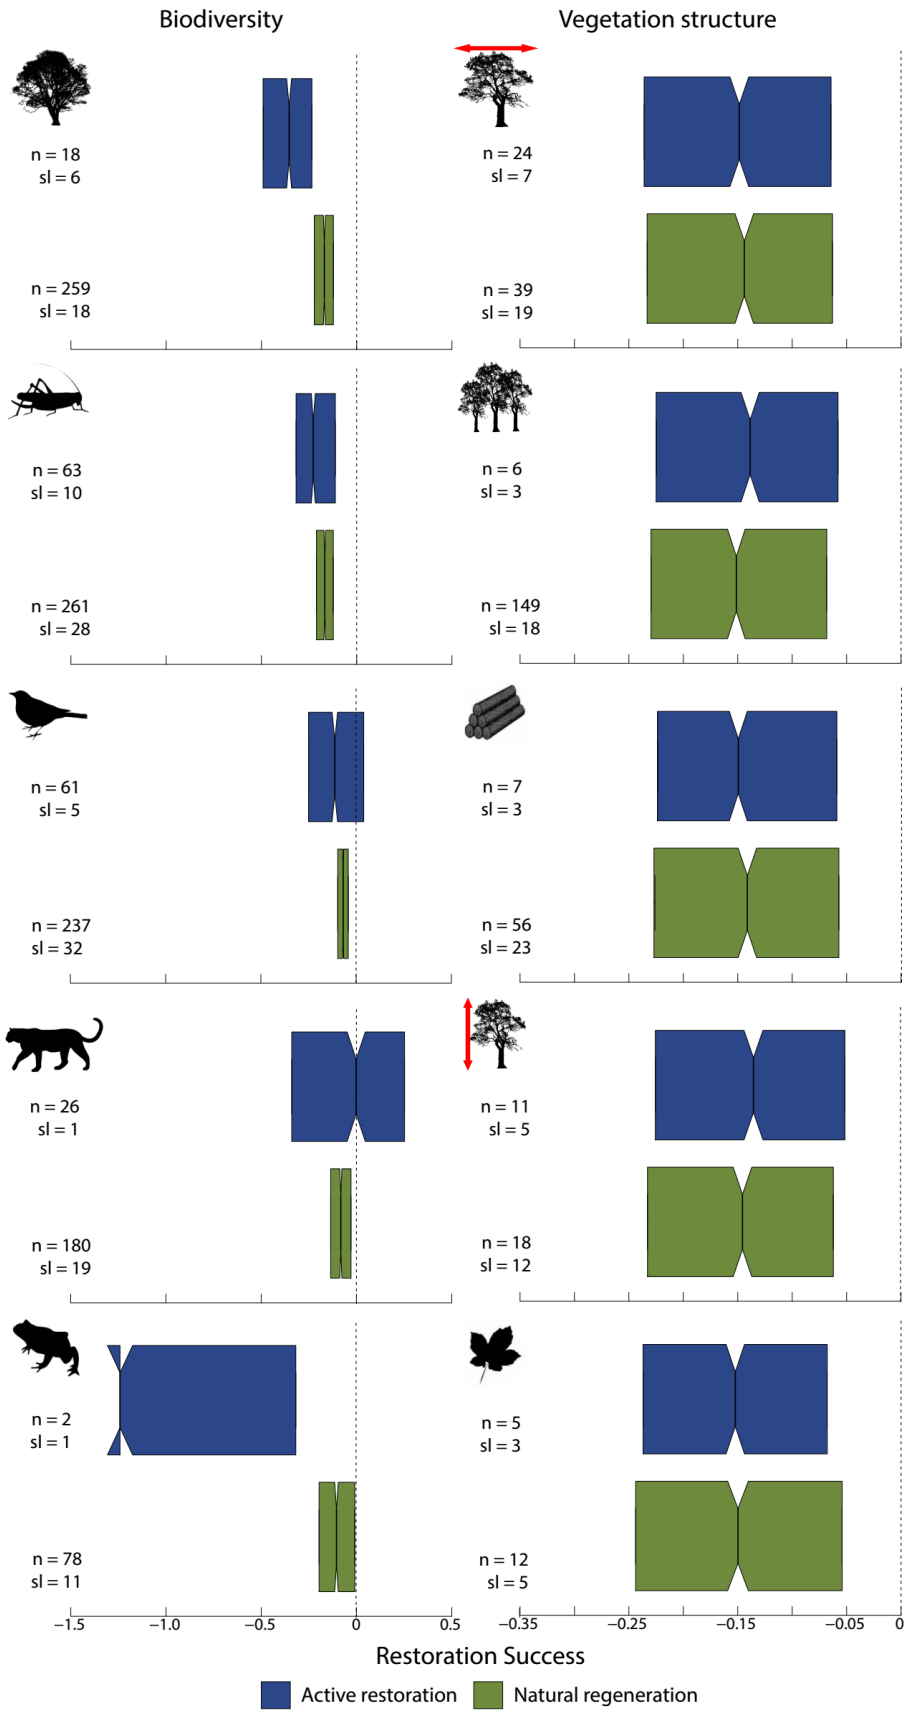

**fig. S1. Meta-analysis without controlling for the biotic and abiotic factors.** Bootstrapped mean response ratio for biodiversity (plants, invertebrates, birds, mammals, and herpetofauna) and vegetation structure (cover, density, biomass, height, and litter) in natural regeneration or active restoration systems compared with reference systems without controlling for the four biotic and abiotic factors (forest cover at the landscape scale, total annual precipitation, past disturbance, and the time elapsed since restoration started).  $n$  = total sample size,  $sl$  = number of study landscapes (sample size used in each resampling to avoid spatial pseudo-replication). Each box plot shows the median value (central solid line), first and third quartile ranges (left and right outer borders of the box) of 1,000 resampled (with replacement) mean effect sizes. Dashed lines indicate an effect size of zero, i.e. no difference to reference systems. Notches in boxes represent 95% confidence intervals, and thus non-overlapping notches between boxes imply a significant difference (68).

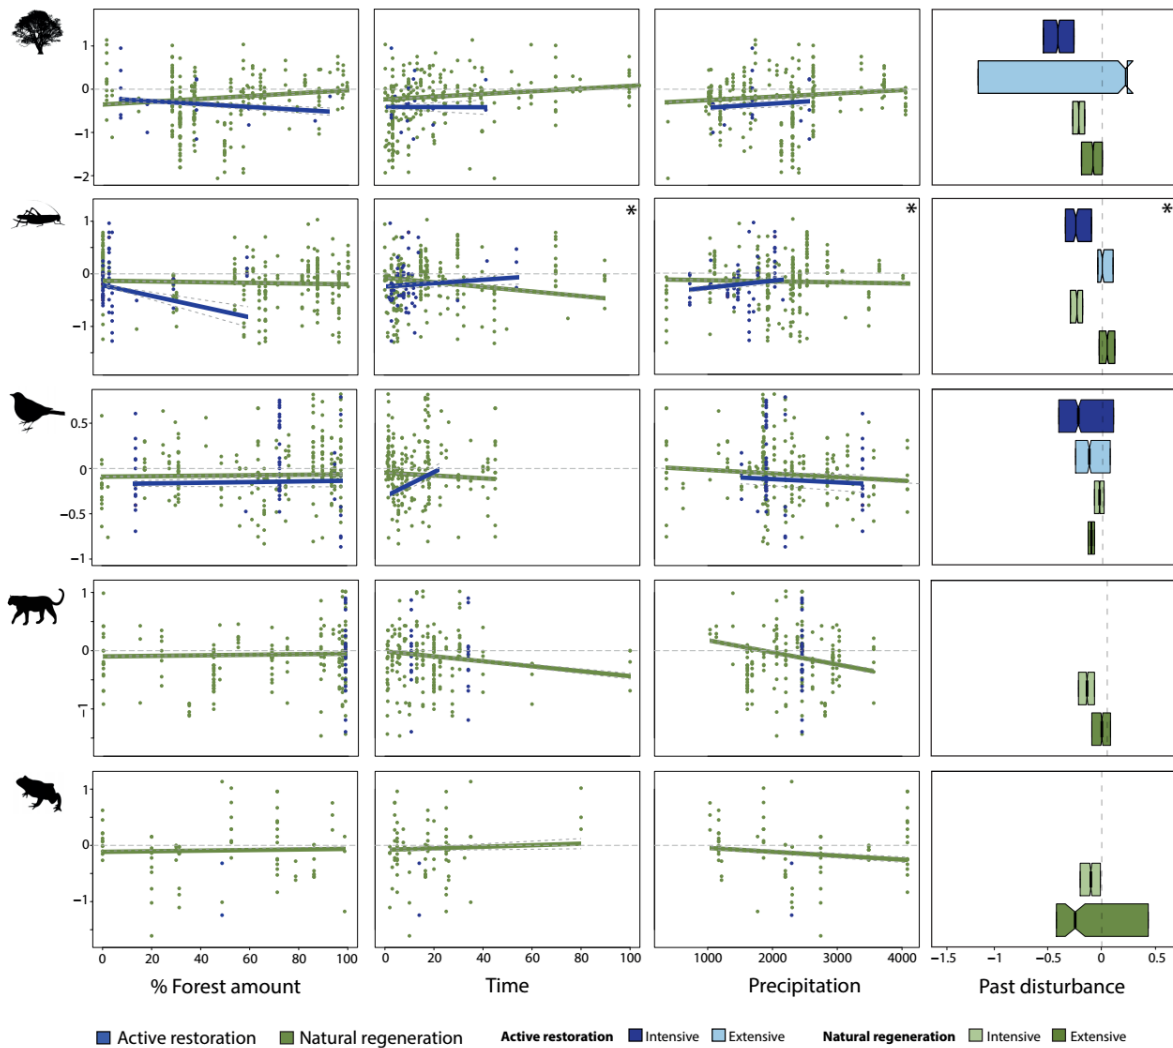

**fig. S2. Regression and box plot analyses for biodiversity.** Bootstrapped mean response ratio for biodiversity (plants, invertebrates, birds, mammals and herpetofauna) in natural regeneration or active regeneration systems compared with reference systems controlled for three of the four biotic and abiotic factors (forest cover at the landscape scale, total annual precipitation, past disturbance, and the time elapsed since restoration started). The total sample size and the number of study landscapes are found in the Fig. 1. Each plot shows all standardized mean effect sizes for natural regeneration and active restoration systems, the median value (green or blue solid line), and the 95% confidence intervals (gray dashed lines) of 10,000 resampled (with replacement) mean response ratios. Horizontal dashed line indicates a response ratio of zero, i.e. no difference to reference systems. \* = not controlled for amount of forest cover (always significantly different between natural regeneration and active restoration systems). For mammals and herpetofauna, restoration success was not estimated in active restoration systems due to the small number of study landscapes.

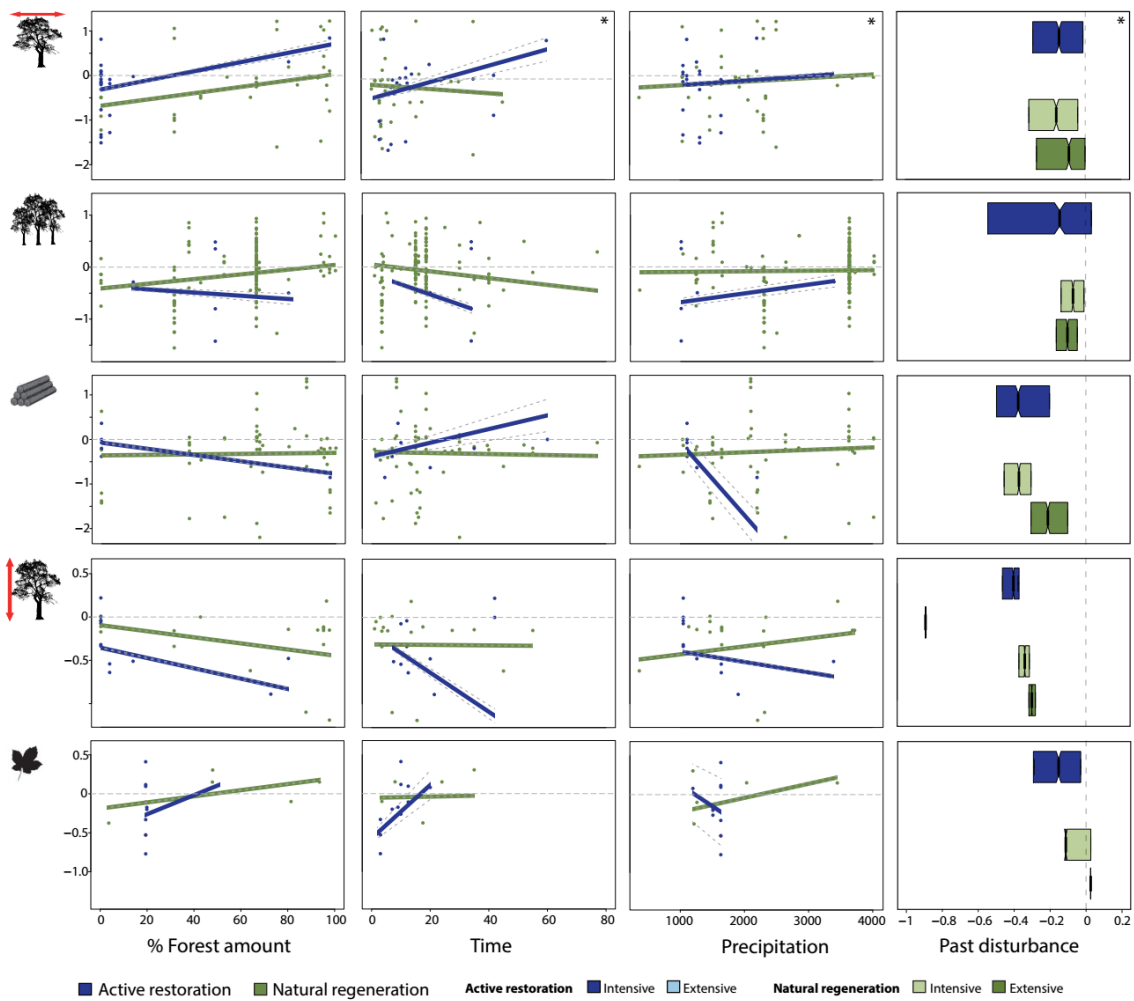

**fig. S3. Regression and box plot analyses for vegetation structure.** Bootstrapped mean response ratio for vegetation structure (cover, density, biomass, height and litter) in natural regeneration or active regeneration systems compared with reference systems controlled for three of the four biotic and abiotic factors (forest cover at the landscape scale, total annual precipitation, past disturbance, and the time elapsed since restoration started). The total sample size and the number of study landscapes are found in the Fig. 1. Each plot shows all standardized mean effect sizes for natural regeneration and active restoration systems, the median value (green or blue solid line), and the 95% confidence intervals (gray dashed lines) of 10,000 resampled (with replacement) mean response ratios. Horizontal dashed line indicates a response ratio of zero, i.e. no difference to reference systems. \* = not controlled for amount of forest cover (always significantly different between natural regeneration and active restoration systems).

**table S1. Median values of response ratios for active restoration and natural regeneration systems compared with reference systems controlled for the four biotic and abiotic factors (forest cover at the landscape scale, total annual precipitation, past disturbance, and the time elapsed since restoration started) and percentage of enhancement of biodiversity and vegetation structure in natural regeneration with respect to active restoration systems. \* = not controlled for amount of forest cover (always significantly different between natural regeneration and active restoration systems).**

|                             | Active<br>restoration | Natural<br>regeneration | Enhancement<br>(%) |
|-----------------------------|-----------------------|-------------------------|--------------------|
| <b>BIODIVERSITY</b>         |                       |                         |                    |
| Plants                      | -0.39                 | -0.17                   | 55.7               |
| Invertebrates*              | -0.24                 | -0.15                   | 36.7               |
| Birds                       | -0.1                  | -0.07                   | 34.2               |
| Mammals                     |                       | -0.1                    |                    |
| Herpeto                     |                       | -0.09                   |                    |
| <b>VEGETATION STRUCTURE</b> |                       |                         |                    |
| Cover*                      | -0.19                 | -0.13                   | 27.5               |
| Density                     | -0.51                 | -0.32                   | 37.6               |
| Biomass                     | -0.37                 | -0.3                    | 18.8               |
| Height                      | -0.39                 | -0.17                   | 55.7               |
| Litter                      | -0.12                 | -0.07                   | 43.6               |

**table S2. Median values of response ratios for active restoration and natural regeneration systems compared with reference systems without controlling for the four biotic and abiotic factors (forest cover at the landscape scale, total annual precipitation, past disturbance, and the time elapsed since restoration started) and percentage of enhancement of biodiversity and vegetation structure in natural regeneration with respect to active restoration systems.**

|                             | Active<br>restoration | Natural<br>regeneration | Enhancement<br>(%) |
|-----------------------------|-----------------------|-------------------------|--------------------|
| <b>BIODIVERSITY</b>         |                       |                         |                    |
| Plants                      | -0.35                 | -0.17                   | 51.43              |
| Invertebrates               | -0.23                 | -0.17                   | 26.09              |
| Birds                       | -0.11                 | -0.07                   | 36.36              |
| Mammals                     | 0                     | -0.08                   | *                  |
| Herpeto                     | -1.24                 | -0.1                    | 91.94              |
| <b>VEGETATION STRUCTURE</b> |                       |                         |                    |
| Cover                       | -0.15                 | -0.14                   | 6.67               |
| Density                     | -0.14                 | -0.15                   | *                  |
| Biomass                     | -0.15                 | -0.14                   | 6.67               |
| Height                      | -0.14                 | -0.15                   | *                  |
| Litter                      | -0.15                 | -0.15                   | 0                  |

**table S3. Selected papers with data available for the meta-analysis.**

---

**References**

---

- Aerts, R. et al. Land rehabilitation and the conservation of birds in a degraded Afromontane landscape in northern Ethiopia. *Biodivers. Conserv.* 17, 53–69 (2008).
- Andersen, A. N. Ants as indicators of restoration success at a uranium mine in Tropical Australia. *Restor. Ecol.* 1, 156–167 (1993).
- Andrade, G. I. & Rubio-Torgler, H. Sustainable use of the Tropical Rain Forest: evidence from the avifauna in a shifting-cultivation habitat mosaic in the Colombian Amazon. *Conserv. Biol.* 8, 545–554 (1994).
- Barlow, J. et al. Quantifying the biodiversity value of tropical primary, secondary, and plantation forests. *PNAS* 104, 18555–18560 (2007).
- Barlow, J., Mestres, L. A. M., Gardner, T. A. & Peres, C. A. The value of primary, secondary and plantation forests for Amazonian birds. *Biol. Conserv.* 136, 212–231 (2007).
- Beck, J., Schulze, C. H., Linsenmair, K. E. & Fiedler, K. From forest to farmland: diversity of geometrid moths along two habitat gradients on Borneo. *J. Trop. Ecol.* 18, 33–51 (2002).
- Becker, C. D. & Ágreda, A. Bird community differences in mature and second growth garúa forest in Machalilla National Park, Ecuador. *Ornitol. Neotrop.* 297–319 (2005).
- Beckman, N. G. & Muller-Landau, H. C. Differential effects of hunting on pre-dispersal seed predation and primary and secondary seed removal of two Neotropical tree species. *Biotropica* 39, 328–339 (2007).
- Bernard, H., Fjeldså, J. & Mohamed, M. A Case Study on the Effects of Disturbance and Conversion of Tropical Lowland Rain Forest on the Non-Volant Small Mammals in North Borneo : Management Implications A case study on the effects of disturbance and conversion of tropical lowland rain forest o. *Mammal Study* 34, 85–96 (2009).
- Beukema, H. & van Noordwijk, M. Terrestrial pteridophytes as indicators of a forest-like environment in rubber production systems in the lowlands of Jambi, Sumatra. *Agric. Ecosyst. Environ.* 104, 63–73 (2004).
- Bicknell, J. & Peres, C. A. Vertebrate population responses to reduced-impact logging in a neotropical forest. *For. Ecol. Manage.* 259, 2267–2275 (2010).
- Blake, J. G. & Loiselle, B. A. Bird assemblages in second-growth and old-growth forests, Costa Rica: perspectives from mist nets and point counts. *Auk* 118, 304–326 (2001).
- Bloemers, G. F., Hodda, M., Lamshead, P. J. D., Lawton, J. H. & Wanless, F. R. The effects of forest disturbance on diversity of tropical soil nematodes. *Oecologia* 111, 575–582 (1997).
- Bobo, K. S., Waltert, M., Fermon, H., Njokagbor, J. & Mühlenberg, M. From forest to farmland: Butterfly diversity and habitat associations along a gradient of forest conversion in southwestern Cameroon. *J. Insect Conserv.* 10, 29–42 (2006).
- Borges, S. H. Bird assemblages in secondary forests developing after slash-and-burn agriculture in the Brazilian Amazon. *J. Trop. Ecol.* 23, 469–477 (2007).
- Bowman, D. M. J. S., Woinarski, J. C. Z., Sands, D. P. A., Wells, A. & McShane, V. J. Slash-and-burn agriculture in the wet coastal lowlands of Papua New Guinea: response of birds, butterflies and reptiles. *J. Biogeogr.* 17, 227–239 (1990).
- Brearley, F. Q., Prajadinata, S., Kidd, P. S., Proctor, J. & Suriantata. Structure and floristics of an old secondary rain forest in Central Kalimantan, Indonesia, and a comparison with adjacent primary forest. *For. Ecol. Manage.* 195, 385–397 (2004).
- Bustos, J. & Ulloa-Chacón, P. Mirmecofauna y perturbación en un bosque de niebla neotropical (Reserva Natural Hato Viejo, Valle del Cauca, Colombia). *Rev. Biol. Trop.* 44, 259–266 (1997).
- Castillo-Campos, G., Halfpeter, G. & Moreno, C. E. Primary and secondary vegetation patches as contributors to floristic diversity in a tropical deciduous forest landscape. *Biodivers. Conserv.* 17,
-



---

1701–1714 (2008).

---

Castro-Arellano, I., Presley, S. J., Saldanha, L. N., Willig, M. R. & Wunderle Jr, J. M. Effects of reduced impact logging on bat biodiversity in terra firme forest of lowland Amazonia. *Biol. Conserv.* 138, 269–285 (2007).

---

Castro-Luna, A. A., Sosa, V. J. & Castillo-Campos, G. Bat diversity and abundance associated with the degree of secondary succession in a tropical forest mosaic in south-eastern Mexico. *Anim. Conserv.* 10, 219–228 (2007).

---

Chapman, C. A., Chapman, L. J., Wrangham, R., Isabirye-Bausta, G. & Ben-David, K. Spatial and temporal variability in the structure of a tropical forest. *Afr. J. Ecol.* 35, 287–302 (1997).

---

Chazdon, R. L. & Coe, F. G. Ethnobotany of woody species in second-growth, old-growth, and selectively logged forests of northeastern Costa Rica. *Conserv. Biol.* 13, 1312–1322 (1999).

---

Chung, A. Y. C., Eggleton, P., Speight, M. R., Hammond, P. M. & Chey, V. K. The diversity of beetle assemblages in different habitat types in Sabah, Malaysia. *Bull. Entomol. Res.* 90, 475–496 (2007).

---

Clarke, F. M., Rostant, V. & Racey, P. A. Life after logging: post-logging recovery of a neotropical bat community. *J. Appl. Ecol.* 42, 409–420 (2005).

---

Costa, F. & Magnusson, W. Selective logging effects on abundance, diversity, and composition of tropical understory herbs. *Ecol. Appl.* 12, 807–819 (2002).

---

Davis, A. J. et al. Dung beetles as indicators of change in the forests of northern Borneo. *J. Appl. Ecol.* 38, 593–616 (2001).

---

DeVries, P. J., Murray, D. & Lande, R. Species diversity in vertical, horizontal, and temporal dimensions of a hit-feeding butterfly community in an Ecuadorian rainforest. *Biol. J. Linn. Soc.* 62, 343–364 (1997).

---

Dewalt, S. J., Maliakal, S. K. & Denslow, J. S. Changes in vegetation structure and composition along a tropical forest chronosequence: implications for wildlife. *For. Ecol. Manage.* 182, 139–151 (2003).

---

Dominguez-Haydar, Y. & Armbrrecht, I. Response of ants and their seed removal in rehabilitation areas and forests at El Cerrejón coal mine in Colombia. *Restor. Ecol.* 19, 178–184 (2011).

---

Dranzoa, C. The avifauna 23 years after logging in Kibale National Park, Uganda. *Biodivers. Conserv.* 7, 777–797 (1998).

---

Edwards, D. P., Ansell, F. A., Ahmad, A. H., Nilus, R. & Hamer, K. C. The value of rehabilitating logged rainforest for birds. *Conserv. Biol.* 23, 1628–1633 (2009).

---

Edwards, D. P. et al. Wildlife-friendly oil palm plantations fail to protect biodiversity effectively. *Conserv. Lett.* 3, 236–242 (2010).

---

Eggleton, P. et al. The species richness and composition of termites (Isoptera) in primary and regenerating lowland dipterocarp forest in Sabah, east Malaysia. *Ecotropica* 3, 119–128 (1997).

---

Eggleton, P. et al. Termite assemblages, forest disturbance and greenhouse gas fluxes in Sabah, East Malaysia. *Philos. Trans. R. Soc. Lond. B. Biol. Sci.* 354, 1791–802 (1999).

---

Eilu, G. & Obua, J. Tree condition and natural regeneration in disturbed sites of Bwindi Impenetrable Forest National Park, southwestern Uganda. *Trop. Ecol.* 46, 99–111 (2005).

---

Eltz, T. Spatio-temporal variation of apine bee attraction to honeybaits in Bornean forests. *J. Trop. Ecol.* 20, 317–324 (2004).

---

Ernst, R. & Rödel, M.-O. Anthropogenically induced changes of predictability in Tropical anuran assemblages. *Ecology* 86, 3111–3118 (2005).

---

Estrada, A., Coates-Estrada, R. & Meritt Jr, D. Non flying mammals and landscape changes in the tropical rain forest region of Los Tuxtlas, Mexico. *Ecography (Cop.)*, 17, 229–241 (1994).

---

Fang, W. & Peng, S. L. Development of species diversity in the restoration process of establishing a tropical man-made forest ecosystem in China. *For. Ecol. Manage.* 99, 185–196 (1997).

---

Faria, D. Phyllostomid bats of a fragmented landscape in the north-eastern Atlantic. *J. Trop. Ecol.*

---

---

22, 531–542 (2006).

---

Farwig, N., Sajita, N. & Böhning-Gaese, K. Forest ecology and management conservation value of forest plantations for bird communities in western Kenya. *For. Ecol. Manage.* 255, 3885–3892 (2008).

---

Felton, A., Wood, J. T., Felton, A. M., Lindenmayer, D. B. & Hennessey, B. A. Conservation International : A comparison of bird communities in the anthropogenic and natural-tree fall gaps of a reduced-impact logged subtropical forest in Bolivia How to cite this article : A comparison of bird communities in the anthropogenic and nat. *Bird Conserv. Int.* 18, 129–143 (2008).

---

Fermon, H., Waltert, M., Vane-Wright, R. I. & Mühlenberg, M. Forest use and vertical stratification in fruit-feeding butterflies of Sulawesi, Indonesia: impacts for conservation. *Biodivers. Conserv.* 14, 333–350 (2005).

---

Fimbel, R. A. & Fimbel, C. C. The role of exotic conifer plantations in rehabilitating degraded tropical forest lands: A case study from the Kibale Forest in Uganda. *For. Ecol. Manage.* 81, 215–226 (1996).

---

Fimbel, C. The relative use of abandoned farm clearings and old forest habitats by primates and a forest antelope at Tiwai, Sierra Leone, West Africa. *Biol. Conserv.* 70, 277–286 (1994).

---

Floren, A., Freking, A., Biehl, M. & Linsenmair, K. E. Anthropogenic disturbance changes the structure of arboreal tropical ant communities. *Ecography (Cop.)*. 24, 547–554 (2001).

---

Fonseca, G. A. B. da. Small mammal species diversity in Brazilian tropical primary and secondary forests of different sizes. *Rev. Bras. Zool.* 6, 381–421 (1989).

---

Fredericksen, N. J. & Fredericksen, T. S. Terrestrial wildlife responses to logging and fire in a Bolivian tropical humid forest. *Biodivers. Conserv.* 11, 27–38 (2002).

---

Fukushima, M. et al. Secondary forest succession after the cessation of swidden cultivation in the montane forest area in Northern Thailand. *For. Ecol. Manage.* 255, 1994–2006 (2008).

---

Gardner, T. A. et al. The Value of primary, secondary, and plantation forests for a Neotropical herpetofauna. *Conserv. Biol.* 21, 775–787 (2007).

---

Glor, R. E., Flecker, A. S., Benard, M. F. & Power, A. G. Lizard diversity and agricultural disturbance in a Caribbean forest landscape. *Biodivers. Conserv.* 10, 711–723 (2001).

---

Gove, A. D., Majer, J. D. & Rico-Gray, V. Methods for conservation outside of formal reserve systems: The case of ants in the seasonally dry tropics of Veracruz, Mexico. *Biol. Conserv.* 126, 328–338 (2005).

---

Grimbacher, P. S. & Catterall, C. P. How much do site age, habitat structure and spatial isolation influence the restoration of rainforest beetle species assemblages? *Biol. Conserv.* 135, 107–118 (2007).

---

Grogan, J. et al. What loggers leave behind: Impacts on big-leaf mahogany (*Swietenia macrophylla*) commercial populations and potential for post-logging recovery in the Brazilian Amazon. *For. Ecol. Manage.* 255, 269–281 (2008).

---

Grove, S. J. The influence of forest management history on the integrity of the saproxylic beetle fauna in an Australian lowland tropical rainforest. *Biol. Conserv.* 104, 149–171 (2002).

---

Guariguata, M. R., Chazdon, R. L., Denslow, J. S., Dupuy, J. M. & Anderson, L. Structure and floristics of secondary and old-growth forest stands in lowland Costa Rica. *Plant Ecol.* 132, 107–120 (1997).

---

Hawes, J. et al. Diversity and composition of Amazonian moths in primary, secondary and plantation forests. *J. Trop. Ecol.* 25, 281–300 (2009).

---

Heinen, J. T. Comparisons of the leaf litter herpetofauna in abandoned cacao plantations and primary rain forest in Costa Rica: some implications for faunal restoration. *Biotropica* 24, 431–439 (1992).

---

Hill, J. K., Hamer, K. C., Dawood, M. M., Tangah, J. & Chey, V. K. Rainfall but not selective logging affect changes in abundance of a tropical forest butterfly in Sabah, Borneo. *J. Trop. Ecol.* 19, 35–42 (2003).

---

- 
- Holbech, L. H. The conservation importance of luxuriant tree plantations for lower storey forest birds in south-west Ghana. *Bird Conserv. Int.* 19, 287–308 (2009).
- 
- Horgan, F. G. Invasion and retreat: shifting assemblages of dung beetles amidst changing agricultural landscapes in central Peru. *Biodivers. Conserv.* 18, 3519–3541 (2009).
- 
- Howorth, R. T. & Pendry, C. A. Post-cultivation secondary succession in a Venezuelan lower montane Rain Forest. *Biodivers. Conserv.* 15, 693–715 (2006).
- 
- Johns, A. D. Responses of Amazonian rain forest birds to habitat modification. *J. Trop. Ecol.* 7, 417–437 (1991).
- 
- Jones, M. J., Marsden, S. J. & Linsley, M. D. Effects of habitat change and geographical variation on the bird communities of two Indonesian islands. *Biodivers. Conserv.* 12, 1013–1032 (2003).
- 
- Kanowski, J. J., Catterall, C. P., Wardell-Johnson, G. W., Proctor, H. C. & Reis, T. Development of forest structure on cleared rainforest land in eastern Australia under different styles of reforestation. *For. Ecol. Manage.* 183, 265–280 (2003).
- 
- Kanowski, J. J., Reis, T. M., Catterall, C. P. & Piper, S. D. Factors affecting the use of reforested sites by reptiles in cleared rainforest landscapes in tropical and subtropical Australia. *Restor. Ecol.* 14, 67–76 (2006).
- 
- Kennard, D. K. Secondary forest succession in a tropical dry forest: patterns of development across a 50-year chronosequence in lowland Bolivia. *J. Trop. Ecol.* 18, 53–66 (2002).
- 
- Klanderud, K. et al. Recovery of plant species richness and composition after slash-and-burn agriculture in a tropical rainforest in Madagascar. *Biodivers. Conserv.* 19, 187–204 (2010).
- 
- Klein, B. C. Effects of forest fragmentation on dung and carrion beetle communities in central Amazonia. *Ecology* 70, 1715–1725 (1989).
- 
- Lachat, T. et al. Arthropod diversity in Lama forest reserve (south Benin), a mosaic of natural, degraded and plantation forests. *Biodivers. Conserv.* 15, 3–23 (2006).
- 
- Lambert, F. R. The consequences of selective logging for Bornean lowland forest birds. *Philos. Trans. Biol. Sci.* 335, 443–457 (1992).
- 
- Lambert, T. D., Malcolm, J. R. & Zimmerman, B. L. Effects of mahogany (*Swietenia macrophylla*) logging on small mammal communities, habitat structure, and seed predation in the southeastern Amazon Basin. *For. Ecol. Manage.* 206, 381–398 (2005).
- 
- Lammertink, M. A multiple-site comparison of woodpecker communities in Bornean lowland and hill Forests. *Conserv. Biol.* 18, 746–757 (2004).
- 
- Lawton, J. H. et al. Biodiversity inventories, indicator taxa and effects of habitat modification in tropical forest. *Nature* 391, 72–76 (1998).
- 
- Letcher, S. G. & Chazdon, R. L. Rapid recovery of biomass, species richness, and species composition in a forest chronosequence in northeastern Costa Rica. *Biotropica* 41, 608–617 (2009).
- 
- Lieberman, S. S. Ecology of the leaf litter herpetofauna of a neotropical rain forest: La Selva, Costa Rica. *Acta Zoo Mex.* 15, 1–72 (1986).
- 
- Liow, L. H., Sodhi, N. S. & Elmqvist, T. Bee diversity along a disturbance gradient in tropical lowland forests of south-east Asia. *J. Appl. Ecol.* 38, 180–192 (2001).
- 
- Lozada, T., de Koning, G. H. J., Marché, R., Klein, A. & Tschardtke, T. Tree recovery and seed dispersal by birds: Comparing forest, agroforestry and abandoned agroforestry in coastal Ecuador. *Perspect. Plant Ecol. Evol. Syst.* 8, 131–140 (2007).
- 
- Luja, V. H., Herrando-Pérez, S., Gonzáles-Solís, D. & Luiselli, L. Secondary rain forests are not havens for reptile species in Tropical Mexico. *Biotropica* 40, 747–757 (2008).
- 
- Macgregor-Fors, I., Blanco-García, A. & Lindig-Cisneros, R. Bird community shifts related to different forest restoration efforts: A case study from a managed habitat matrix in Mexico. *Ecol. Eng.* 36, 1492–1496 (2010).
- 
- Majer, J. D. Ant recolonisation of rehabilitated bauxite mines of Poços de Caldas, Brazil. *J. Trop. Ecol.* 8, 97–108 (1992).
-

- Marín-Spiotta, E., Silver, W. L. & Ostertag, R. Long-term patterns in tropical reforestation: plant community composition and aboveground biomass accumulation. *Ecol. Appl.* 17, 828–839 (2007).
- Marsden, S. J. Changes in bird abundance following selective logging on Seram, Indonesia. *Conserv. Biol.* 12, 605–611 (1998).
- Martin, P. H., Sherman, R. E. & Fahey, T. J. Forty years of tropical forest recovery from agriculture: structure and floristics of secondary and old-growth riparian forests in the Dominican Republic. *Biotropica* 36, 297–317 (2004).
- Mason, D. Responses of Venezuelan understory birds to selective logging, enrichment strips, and vine cutting. *Biotropica* 28, 296–309 (1996).
- Medellín, R. A., Equihua, M. & Amin, M. A. Bat diversity and abundance as indicators of disturbance in Neotropical rainforests. *Conserv. Biol.* 14, 1666–1675 (2000).
- Nakagawa, M., Miguchi, H. & Nakashizuka, T. The effects of various forest uses on small mammal communities in Sarawak, Malaysia. *For. Ecol. Manage.* 231, 55–62 (2006).
- Negrete-yankelevich, S., Fragoso, C., Newton, A. C. & Heal, O. W. Successional changes in soil, litter and macroinvertebrate parameters following selective logging in a Mexican Cloud Forest. *Appl. Geogr.* 35, 340–355 (2007).
- Nicolas, V., Barrie, P., Tapiero, A. & Colyn, M. Shrew species diversity and abundance in Ziama Biosphere Reserve, Guinea: comparison among primary forest, degraded forest and restoration plots. *Biodivers. Conserv.* 18, 2043–2061 (2009).
- Nijman, V. Effects of habitat disturbance and hunting on the density and the biomass of the endemic Hose's leaf monkey *Presbytis hosei* (Thomas, 1889) (Mammalia: Primates: Cercopithecidae) in east Borneo. *Contrib. to Zool.* 73, 283–291 (2004).
- O'Dea, N. & Whittaker, R. J. How resilient are Andean montane forest bird communities to habitat degradation? *Biodivers. Conserv.* 16, 1131–1159 (2007).
- Olander, L. P., Scatena, F. N. & Silver, W. L. Impacts of disturbance initiated by road construction in a subtropical cloud forest in the Luquillo experimental forest, Puerto Rico. *For. Ecol. Manage.* 109, 33–49 (1998).
- Owiunji, I. & Plumptre, A. J. Bird communities in logged and unlogged compartments in Budongo Forest, Uganda. *For. Ecol. Manage.* 108, 115–126 (1998).
- Parrotta, J. A. & Knowles, O. H. Restoring tropical forests on lands mined for bauxite: Examples from the Brazilian Amazon. *Ecol. Eng.* 17, 219–239 (2001).
- Parry, L., Barlow, J. & Peres, C. A. Large-vertebrate assemblages of primary and secondary forests in the Brazilian Amazon. *J. Trop. Ecol.* 23, 653–662 (2007).
- Pascarella, J. B., Aide, T. M., Serrano, M. I. & Zimmerman, J. K. Land-use history and forest regeneration in the Cayey Mountains, Puerto Rico. *Ecosystems* 3, 217–228 (2000).
- Passell, H. D. Recovery of bird species in minimally restored Indonesian Tin Strip mines. *Restor. Ecol.* 8, 112–118 (2000).
- Pawar, S. S., Rawat, G. S. & Choudhury, B. C. Recovery of frog and lizard communities following primary habitat alteration in Mizoram, Northeast India. *BMC Ecol.* 4, 10–28 (2004).
- Peh, K. S.-H., Jong, J. de, Sodhi, N. S., Lim, S. L.-H. & Yap, C. A.-M. Lowland rainforest avifauna and human disturbance: persistence of primary forest birds in selectively logged forests and mixed-rural habitats of southern Peninsular Malaysia. *Biol. Conserv.* 123, 489–505 (2005).
- Piper, S. D., Catterall, C. P., Kanowski, J. J. & Proctor, H. C. Biodiversity recovery during rainforest reforestation as indicated by rapid assessment of epigeic ants in tropical and subtropical Australia. *Austral Ecol.* 34, 422–434 (2009).
- Powers, J. S., Becknell, J. M., Irving, J. & Pérez-Aviles, D. Diversity and structure of regenerating tropical dry forests in Costa Rica: Geographic patterns and environmental drivers. *For. Ecol. Manage.* 258, 959–970 (2009).
- Purata, S. E. Floristic and structural changes during old-field succession in the Mexican tropics in

- 
- relation to site history and species availability. *J. Trop. Ecol.* 2, 257–276 (1986).
- 
- Quintero, I. & Roslin, T. Rapid recovery of dung beetle communities following habitat fragmentation in Central Amazonia. *Ecology* 86, 3303–3311 (2005).
- 
- Reid, J. L., Harris, B. C. & Zahawi, R. A. Avian habitat preference in tropical forest restoration in Southern Costa Rica. *Biotropica* 44, 350–359 (2012).
- 
- Renner, S. C., Waltert, M. & Mühlenberg, M. Comparison of bird communities in primary vs. young secondary tropical montane cloud forest in Guatemala. *Biodivers. Conserv.* 15, 1545–1575 (2006).
- 
- Roth, D. S., Perfecto, I. & Rathcke, B. The effects of management systems on ground-foraging ant diversity in Costa Rica. *Ecol. Appl.* 4, 423–436 (1994).
- 
- Sáfián, S., Csontos, G. & Winkler, D. Butterfly community recovery in degraded rainforest habitats in the Upper Guinean Forest Zone (Kakum forest, Ghana). *J. Insect Conserv.* 15, 351–359 (2010).
- 
- Sarmiento, L., Llambí, L. D., Escalona, A. & Marquez, N. Vegetation patterns, regeneration rates and divergence in an old-field succession of the high tropical Andes. *Plant Ecol.* 166, 63–74 (2003).
- 
- Scheffler, P. Y. Dung beetle (Coleoptera: Scarabaeidae) diversity and community structure across three disturbance regimes in eastern Amazonia. *J. Trop. Ecol.* 21, 9–19 (2005).
- 
- Schonberg, L. A., Longino, J. T., Nadkarni, N. M., Yanoviak, S. P. & Gering, J. C. Arboreal ant species richness in primary forest, secondary forest, and pasture habitats of a Tropical montane landscape. *Biotropica* 36, 402–409 (2004).
- 
- Shahabuddin, Schulze, C. H. & Tschardtke, T. Changes of dung beetle communities from rainforests towards agroforestry systems and annual cultures in Sulawesi (Indonesia). *Biodivers. Conserv.* 14, 863–877 (2005).
- 
- Slik, J. W. F. & Eichhorn, K. A. O. Fire survival of lowland tropical rain forest trees in relation to stem diameter and topographic position. *Oecologia* 137, 446–55 (2003).
- 
- Slik, J. W. F. & Balen, S. Van. Bird community changes in response to single and repeated fires in a lowland tropical rainforest of eastern Borneo. *Biodivers. Conserv.* 15, 4425–4451 (2006).
- 
- Slik, J. W. F. El Niño droughts and their effects on tree species composition and diversity in tropical rain forests. *Oecologia* 141, 114–120 (2004).
- 
- Slik, J. W. F., Verburg, R. W. & Keßler, P. J. A. Effects of fire and selective logging on the tree species composition of lowland dipterocarp forest in East Kalimantan, Indonesia. *Biodivers. Conserv.* 11, 85–98 (2002).
- 
- Sodhi, N. S. et al. Land use and conservation value for forest birds in Central Sulawesi (Indonesia). *Biol. Conserv.* 122, 547–558 (2005).
- 
- Sorensen, T. C. & Fedigan, L. M. Distribution of three monkey species along a gradient of regenerating tropical dry forest. *Biol. Conserv.* 92, 227–240 (2000).
- 
- Souza, V. M. de, Souza, M. B. de & Morato, E. F. Efeitos da sucessão florestal sobre a anurofauna (Amphibia: Anura) da Reserva Catuaba e seu entorno, Acre, Amazônia sul-ocidental. *Rev. Bras. Zool.* 25, 49–57 (2008).
- 
- Vallan, D. Effects of anthropogenic environmental changes on amphibian diversity in the rain forests of eastern Madagascar. *J. Trop. Ecol.* 18, 725–742 (2002).
- 
- Vasconcelos, H. L. Effects of forest disturbance on the structure of ground-foraging ant communities in central Amazonia. *Biodivers. Conserv.* 8, 409–420 (1999).
- 
- Veddeler, D., Schulze, C. H., Steffan-Dewenter, I., Buchori, D. & Tschardtke, T. The contribution of Tropical Secondary Forest fragments to the conservation of fruit-feeding butterflies: effects of isolation and age. *Biodivers. Conserv.* 14, 3577–3592 (2005).
- 
- Vieira, L., Louzada, J. N. C. & Spector, S. Effects of degradation and replacement of southern Brazilian coastal sandy vegetation on the dung beetles (Coleoptera: Scarabaeidae). *Biotropica* 40, 719–727 (2008).
- 
- Vulinec, K., Lambert, J. E. & Mellow, D. J. Primate and dung beetle communities in secondary growth rain forests: implications for conservation of seed dispersal systems. *Int. J. Primatol.* 27, 855–
-

---

879 (2006).

---

Waltert, M., Mardiasuti, A. & Uhlenberg, M. M. Effects of land use on bird species richness in Sulawesi, Indonesia. *Conserv. Biol.* 18, 1339–1346 (2004).

---

Waltert, M., Mardiasuti, A. & Mühlenberg, M. Effects of deforestation and forest modification on understory birds in Central Sulawesi, Indonesia. *Bird Conserv. Int.* 15, 257–273 (2005).

---

Wells, K., Kalko, E. K. V, Lakim, M. B. & Pfeiffer, M. Effects of rain forest logging on species richness and assemblage composition of small mammals in Southeast Asia. *J. Biogeogr.* 34, 1087–1099 (2007).

---

Wijesinghe, M. R. & Brooke, M. de L. Impact of habitat disturbance on the distribution of endemic species of small mammals and birds in a tropical rain forest in Sri Lanka. *J. Trop. Ecol.* 21, 661–668 (2005).

---

Willott, S. J. The effects of selective logging on the distribution of moths in a Bornean rainforest. *Philos. Trans. R. Soc. Lond. B. Biol. Sci.* 354, 1783–1790 (1999).

---

Willott, S. J., Lim, D. C., Compton, S. G. & Sutton, S. L. Effects of selective logging on the butterflies of a Bornean Rainforest. *Conserv. Biol.* 14, 1055–1065 (2000).

---

Wu, D., Luot, J. & Fox, B. J. A comparison of ground-dwelling small mammal communities in primary and secondary tropical rainforests in China. *J. Trop. Ecol.* 12, 215–230 (1996).

---

Wunderle, J. M., Henriques, L. M. P. & Willig, M. R. Short-term responses of birds to forest gaps and understory: an assessment of reduced-impact logging in a lowland Amazon Forest. *Biotropica* 38, 235–255 (2006).

---

Yap, C. A.-M., Sodhi, N. S. & Peh, K. S.-H. Phenology of tropical birds in peninsular Malaysia: effects of selective logging and food resources. *Auk* 124, 945–961 (2007).

---
